# Supplementary material
Source: PubMed Central journal article supplement (PMC8525219)

## Supplemental Data

This is a supplement to Herrera AF, Burton C, Radford J, et al. Avelumab in relapsed/refractory classical Hodgkin lymphoma: phase 1b results from the JAVELIN Hodgkins trial

**Supplemental Table 1. Summary of PK parameters for avelumab treatment groups**

|                                   | Avelumab treatment group |             |               |               |               |
|-----------------------------------|--------------------------|-------------|---------------|---------------|---------------|
|                                   | 70 mg Q2W                | 350 mg Q2W  | 500 mg Q2W    | 500 mg Q3W    | 10 mg/kg Q2W  |
| <b>Cycle 1 day 1</b>              |                          |             |               |               |               |
| <b>AUC<sub>tau</sub>, h•µg/mL</b> |                          |             |               |               |               |
| Patients, n                       | 4                        | 6           | 6             | 6             | 6             |
| Geometric mean (CV %)             | 1933 (64)                | 8450 (28)   | 15,436 (38)   | 15,392 (27)   | 23,780 (54)   |
| Minimum-maximum                   | 1020-4110                | 5190-11,400 | 9460-26,600   | 10,400-22,500 | 11,400-39,900 |
| <b>C<sub>max</sub>, µg/mL</b>     |                          |             |               |               |               |
| Patients, n                       | 3                        | 3           | 4             | 4             | 3             |
| Geometric mean (CV %)             | 24.0 (35)                | 68.4 (33)   | 143 (24)      | 126 (15)      | 271 (16)      |
| Minimum-maximum                   | 16.9-33.5                | 56.0-99.7   | 119-195       | 110-149       | 228-312       |
| <b>t<sub>1/2</sub>, days</b>      |                          |             |               |               |               |
| Patients, n                       | 3                        | 4           | 5             | 6             | 5             |
| Geometric mean (CV %)             | 3.49 (28)                | 3.25 (44)   | 4.38 (39)     | 4.04 (23)     | 3.88 (38)     |
| Minimum-maximum                   | 2.91-4.76                | 2.27-5.32   | 3.16-7.55     | 2.79-5.59     | 2.42-6.39     |
| <b>Cycle 2 day 1</b>              |                          |             |               |               |               |
| <b>AUC<sub>tau</sub>, h•µg/mL</b> |                          |             |               |               |               |
| Patients, n                       | 3                        | 5           | 5             | 5             | 5             |
| Geometric mean (CV %)             | 2067 (6)                 | 8789 (39)   | 21,053 (47)   | 19,173 (23)   | 27,196 (59)   |
| Minimum-maximum                   | 1950-2200                | 5490-14,000 | 10,800-35,600 | 15,400-27,600 | 13,900-50,100 |
| <b>C<sub>max</sub>, µg/mL</b>     |                          |             |               |               |               |
| Patients, n                       | 3                        | 3           | 4             | 3             | 2             |
| Geometric mean (CV %)             | 26.1 (21)                | 78.7 (19)   | 195 (46)      | 135 (8)       | 273 (22)      |
| Minimum-maximum                   | 22.0-32.7                | 67.3-97.5   | 115-321       | 127-147       | 233-319       |
| <b>C<sub>trough</sub>, µg/mL</b>  |                          |             |               |               |               |
| Patients, n                       | 4                        | 6           | 6             | 5             | 6             |
| Geometric mean (CV %)             | 1.71 (163)               | 4.03 (110)  | 12.1 (93)     | 2.54 (125)    | 14.4 (170)    |
| Minimum-maximum                   | BLQ-3.83                 | BLQ-11.3    | 4.86-36.7     | 0.714-8.95    | 2.20-54.5     |
| <b>t<sub>1/2</sub>, days</b>      |                          |             |               |               |               |
| Patients, n                       | 3                        | 5           | 4             | 4             | 5             |
| Geometric mean (CV %)             | 2.92 (13)                | 3.43 (43)   | 4.59 (36)     | 4.62 (17)     | 4.23 (37)     |
| Minimum-maximum                   | 2.68-3.37                | 2.32-6.13   | 3.07-7.03     | 3.95-5.89     | 2.71-6.25     |

AUC<sub>tau</sub>, area under the plasma concentration-time profile from time zero (predose) to the next dose; BLQ, below limit of quantitation; C<sub>max</sub>, maximum observed plasma concentration; C<sub>trough</sub>, predose trough concentration during multiple dosing; CV %, coefficient variation for geometric mean; Q2W, every 2 weeks; Q3W, every 3 weeks; t<sub>1/2</sub>, terminal half-life.

**Supplemental Table 2. Immune-related adverse events**

| Cluster<br>Preferred term                                        | N=30      |          |
|------------------------------------------------------------------|-----------|----------|
|                                                                  | Any grade | Grade ≥3 |
| <b>Patients with events, n (%)</b>                               | 9 (30.0)  | 5 (16.7) |
| <b>Immune-related rash, n (%)</b>                                | 3 (10.0)  | –        |
| Rash                                                             | 2 (6.7)   | –        |
| Rash papular                                                     | 1 (3.3)   | –        |
| <b>Immune-related hepatitis, n (%)</b>                           | 2 (6.7)   | 1 (3.3)  |
| Alanine aminotransferase increased                               | 1 (3.3)   | –        |
| Aspartate aminotransferase increased                             | 1 (3.3)   | –        |
| Transaminases increased                                          | 1 (3.3)   | 1 (3.3)  |
| <b>Other immune-related adverse events: GVHD, n (%)</b>          | 2 (6.7)   | 2 (6.7)  |
| GVHD in liver                                                    | 2 (6.7)   | 2 (6.7)  |
| Chronic GVHD in skin*                                            | 1 (3.3)   | 1 (3.3)  |
| <b>Immune-related endocrinopathies: thyroid disorders, n (%)</b> | 1 (3.3)   | –        |
| Blood thyroid-stimulating hormone increased                      | 1 (3.3)   | –        |
| <b>Immune-related pneumonitis, n (%)</b>                         | 1 (3.3)   | 1 (3.3)  |
| Pneumonitis <sup>†</sup>                                         | 1 (3.3)   | 1 (3.3)  |
| <b>Other immune-related adverse events, n (%)</b>                | 1 (3.3)   | 1 (3.3)  |
| Immune thrombocytopenic purpura                                  | 1 (3.3)   | 1 (3.3)  |
| <b>Other immune-related adverse events: uveitis, n (%)</b>       | 1 (3.3)   | –        |
| Iritis                                                           | 1 (3.3)   | –        |

GVHD, graft-versus-host disease.

\*Event occurred outside the on-treatment period.

<sup>†</sup>Grade 5 event.

**Supplemental Figure 1.  $C_{max}$  (A) and  $C_{trough}$  (B) values per treatment group.** The symbol in the box interior represents the geometric mean. The horizontal line in the box interior represents the median. Upper and lower box lines represent the 3rd and 1st quartiles, respectively. Ends of vertical lines represent 1 SD above and below the mean. Symbols outside the box represent measurements outside 1 SD from the mean total dose administered within  $\pm 10\%$  of the planned dose. For  $C_{max}$ , summary statistics included concentration values from samples collected within 50 min to 2 h from the beginning of an uninterrupted infusion, with the total dose administered within  $\pm 10\%$  of the planned dose. For median serum avelumab concentration, summary statistics were calculated by setting concentration values below the lower limit of quantification ( $0.20 \mu\text{g/mL}$ ) to zero. C, cycle; D, day;  $C_{max}$ , maximum observed plasma concentration;  $C_{trough}$ , predose trough concentration during multiple dosing; Q2W, every 2 weeks; Q3W, every 3 weeks; SD, standard deviation.

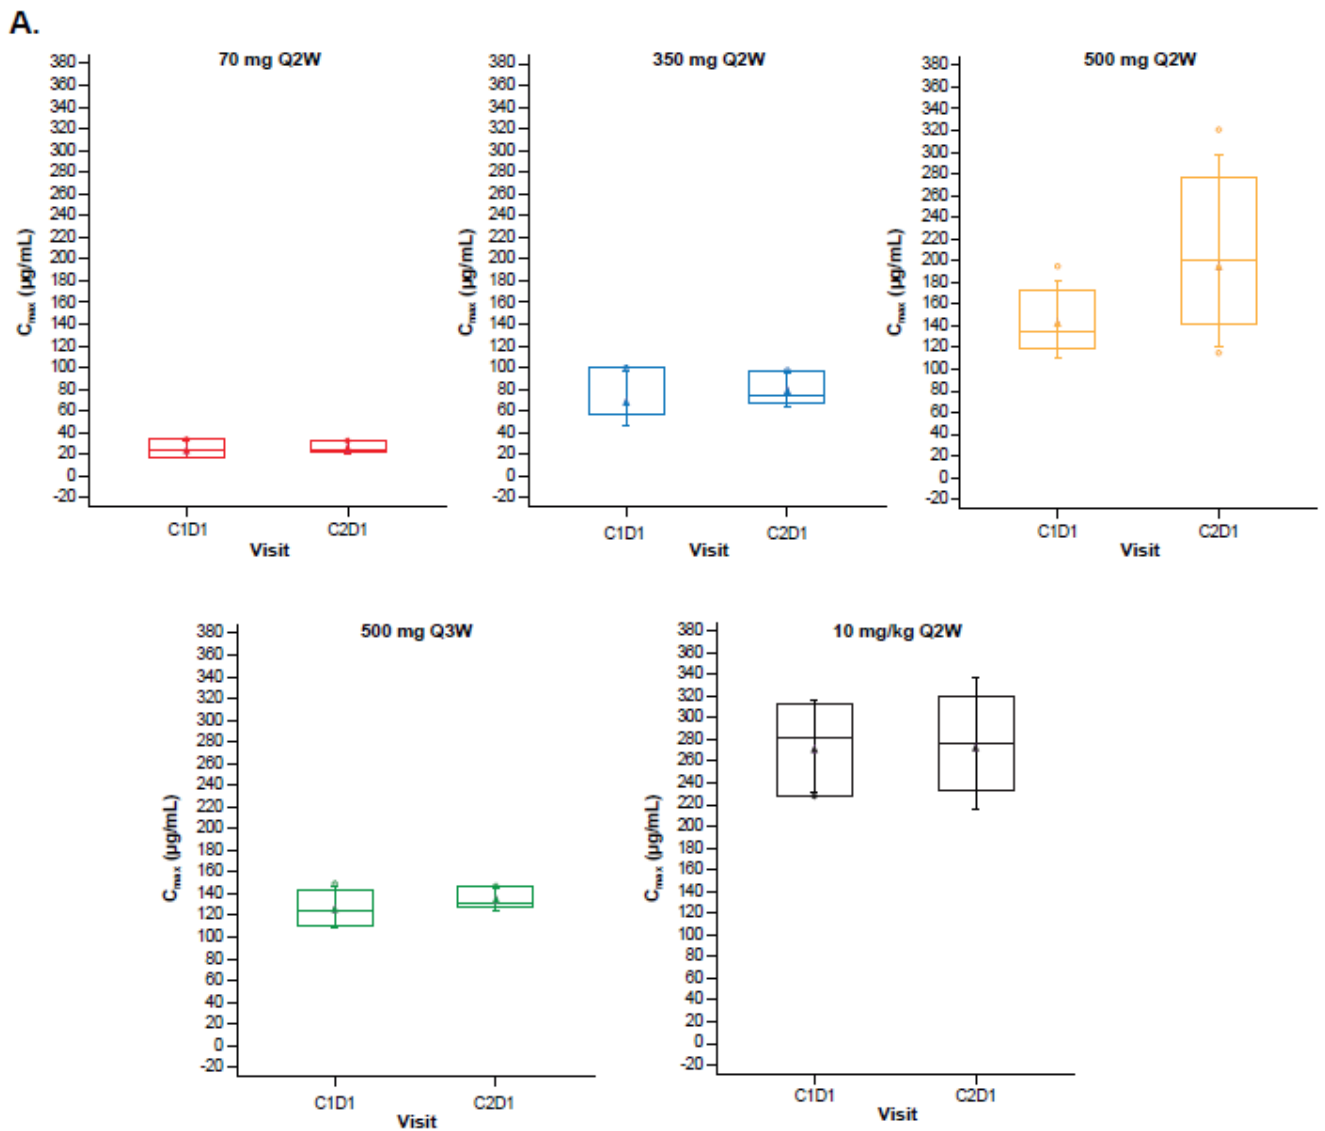

**B.**

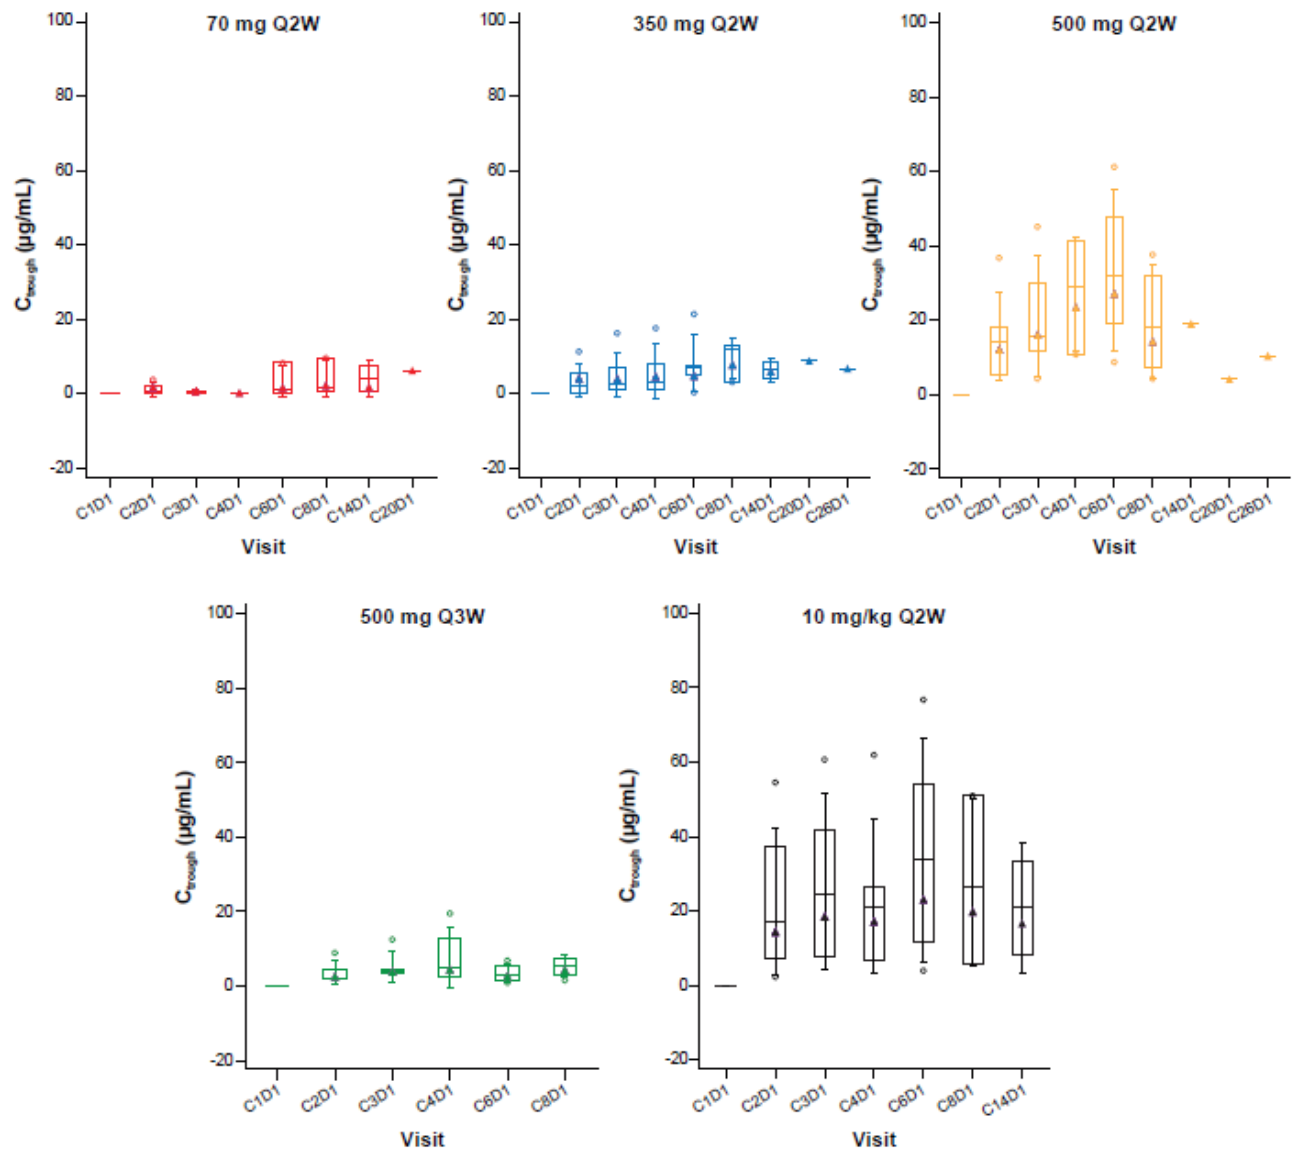

**Supplemental Figure 2. Representative images of FISH detection of PD-L1/PD-L2 polysomy, amplification, and normal copy number cells. FISH, fluorescence in situ hybridization.**

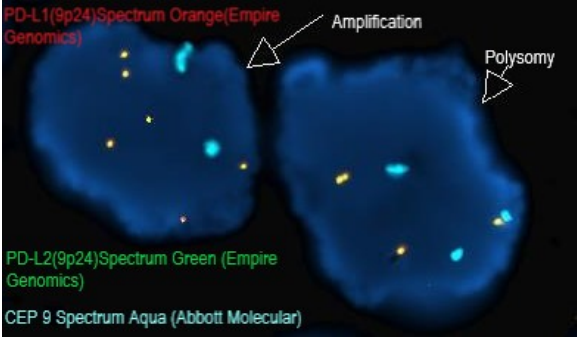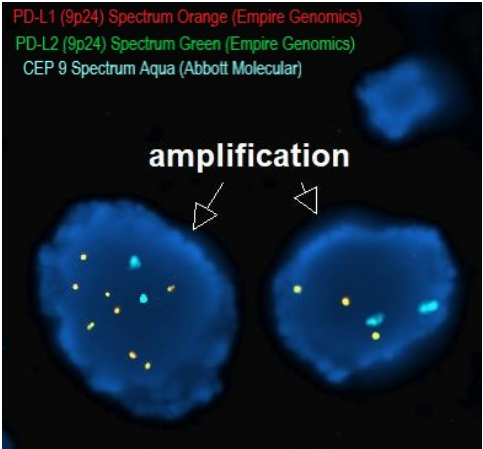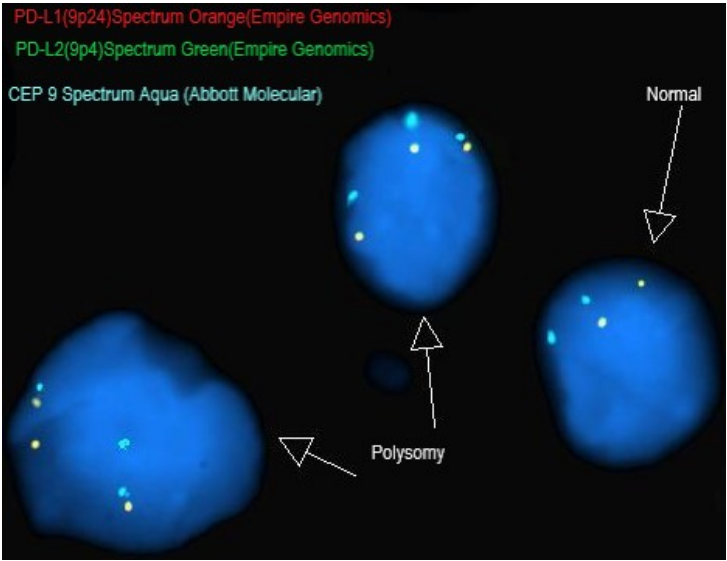

Supplement: advancesADV2021004511-suppl1.pdf [file advancesADV2021004511-suppl1.pdf]
